# Supplementary material for: A strong, underwater superoleophobic PNIPAM–clay nanocomposite hydrogel
Source: Royal Society of Chemistry journal article supplement (doi:10.1039/c6ta03548e), 2016-01-01
Supplement: c6ta03548e1.pdf [file c6ta03548e1.pdf]

## Supporting Information

# Strong, Underwater Superoleophobic PNIPAM-Clay Nanocomposite Hydrogel

Chao Teng,<sup>†</sup> Dan Xie,<sup>†</sup> Jianfeng Wang,<sup>\*</sup> Ying Zhu,<sup>\*</sup> Lei Jiang

Key Laboratory of Bio-Inspired Smart Interfacial Science and Technology of Ministry of Education, Beijing Key Laboratory of Bio-inspired Energy Materials and Devices, School of Chemistry and Environment, Beihang University, Beijing 100191, China.

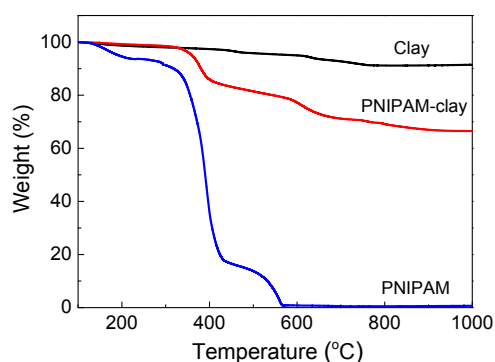

**Fig. S1** TGA curves of clay, PNIPAM and dried PNIPAM-clay hydrogel, indicating that the mass ratio of clay and PNIPAM in the PNIPAM-clay gels is approximately 67:33.

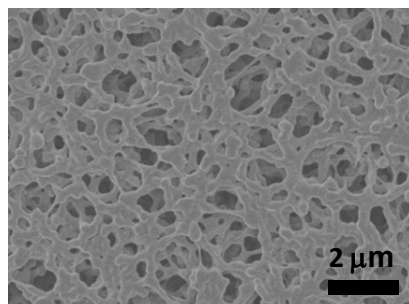

**Fig. S2** SEM image of filter membrane surface, showing irregular interconnected micropores with size in the range of 100 nm to 2 μm.

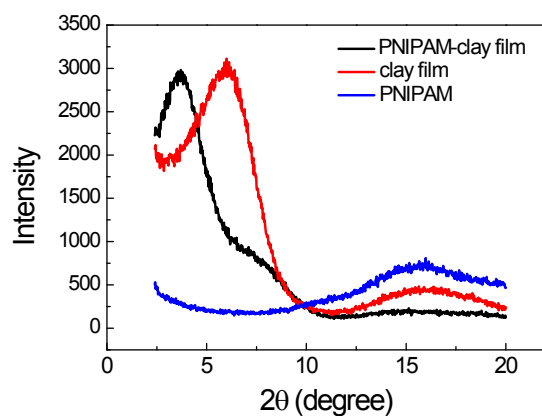

**Fig. S3** Comparison of XRD curves of pure clay, PNIPAM and PNIPAM-clay nanocomposite hydrogel, revealing that the interlayer distance between clay platelets increase from 1.44 nm ( $2\theta=6.1^\circ$ ) for pure clay to 2.32 nm ( $2\theta=3.8^\circ$ ) for the nanocomposite hydrogel.

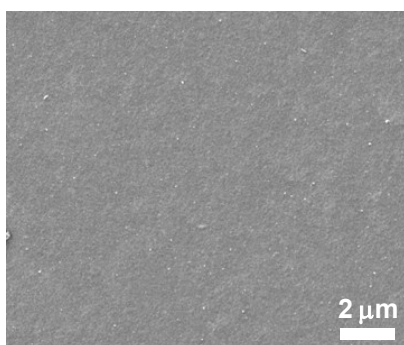

**Fig. S4** The opposite surface of PNIPAM-clay hydrogel film, showing flat featureless morphology

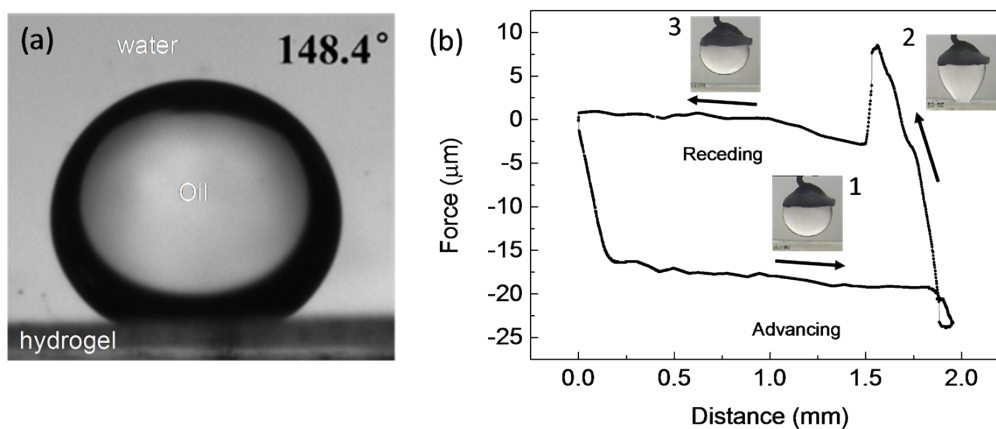

**Fig. S5** (a) The shape of underwater oil droplet on the opposite surface of PNIPAM-clay hydrogel film, showing a contact angle of  $148.4^\circ$ . (b) Force-distance curve of underwater oil droplet on the surface. The inserted photograph 1, 2 and 3 are the shapes of oil droplets before contacted, during left and after left the hydrogel film, respectively. The detecting oil is 1, 2-dichloroethane.

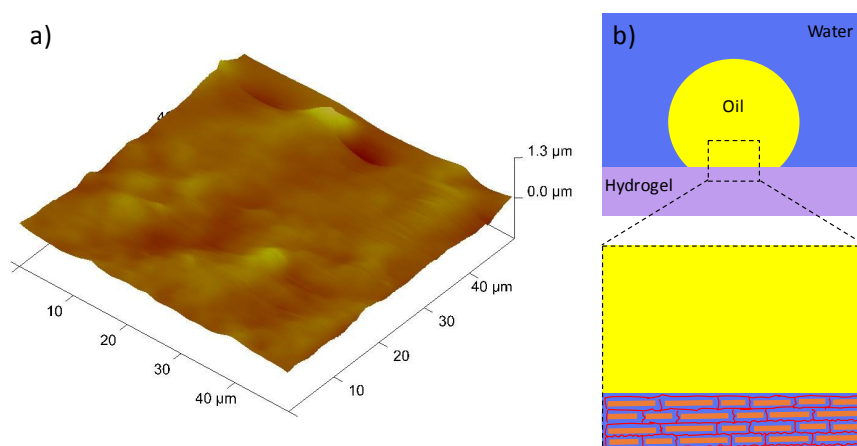

**Fig. S6** (a) AFM image of the opposite surface of PNIPAM-clay nanocomposite hydrogel in water, which has an average root-mean-squared roughness of 103 nm. (b) Proposed wetting state, showing that water within the three-dimensional network of the hydrogel repels oil droplet and leads to oleophobic behavior.

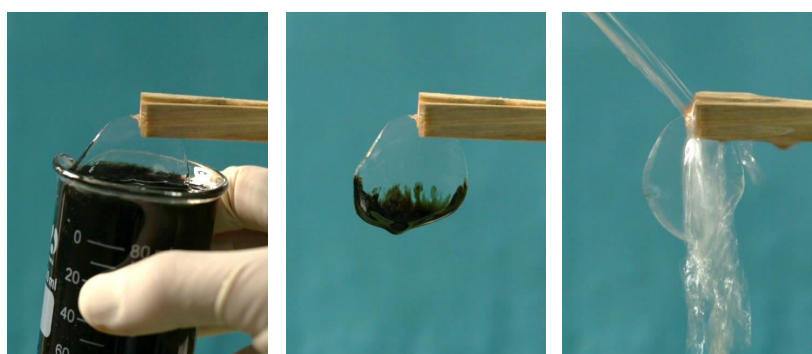

**Fig. S7** Self-cleaning behavior of PNIPAM-clay nanocomposite hydrogel. The hydrogel was immersed into crude oil. The adherent crude oil was easily removed by a stream of water.

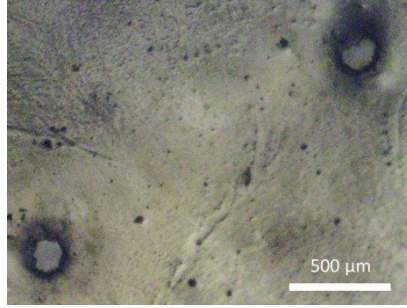

Fig. S8 Optical microscopy of the perforated hydrogel with the average pore diameter of 171  $\mu\text{m}$ .
